# Supplementary material
Source: PubMed Central journal article supplement (PMC3661134)
Supplement: adip-2-17-s01.pdf [file adip-2-17-s01.pdf]

## **Supplemental Material to:**

**Wenying Ren, Jhala S. Ulupi and Keyong Du**

**Proteomic analysis of protein palmitoylation in adipocytes**

**Adipocyte 2013; 2 (1)**

**<http://dx.doi.org/10.4161/adip.22117>**

**<http://www.landesbioscience.com/journals/adipocyte/article/22117/>**

**Table S1**

| <b>No.</b> | <b>Table 1 Putative Palmitoylated Proteins from adipose tissues</b> | <b>Access No.</b>     | <b>*Implicated in Glut4 trafficking</b> |
|------------|---------------------------------------------------------------------|-----------------------|-----------------------------------------|
|            | <b>SIGNAL TRANSDUCTION</b>                                          |                       |                                         |
| 1          | <b>Protein kinases</b>                                              | <b>Access No.</b>     |                                         |
| 2          | <b>AMPK alpha-1</b>                                                 | <b>NP_001013385.3</b> |                                         |
| 3          | <b>CAMKII delta</b>                                                 | <b>AAH52894.1</b>     |                                         |
| 4          | <b>diacylglycerol kinase epsilon</b>                                | <b>Q9R1C6.1</b>       |                                         |
| 5          | <b>Discoidin domain-containing receptor</b>                         | <b>Q62371.2</b>       |                                         |
| 6          | <b>integrin-linked kinase</b>                                       | <b>O55222.2</b>       | <b>x</b>                                |
| 7          | <b>MAPK1</b>                                                        | <b>P63085.3</b>       |                                         |
| 8          | <b>ribose-phosphate pyrophosphokinase 1</b>                         | <b>NP_067438.1</b>    |                                         |
| 9          | <b>mTOR</b>                                                         | <b>Q9JLN9.2</b>       |                                         |
| 10         | <b>phosphatidylinositol 4-kinase type 2-alpha</b>                   | <b>NP_663476.1</b>    | <b>x</b>                                |
| 11         | <b>phosphatidylinositol 4-kinase type 2-beta isoform 1</b>          | <b>NP_080227.2</b>    | <b>x</b>                                |
| 12         | <b>PKA type II-beta regulatory subunit</b>                          | <b>NP_035288.2</b>    |                                         |
| 13         | <b>PKA type II-alpha regulatory subunit</b>                         | <b>NP_032950.1</b>    |                                         |
| 14         | <b>Rho-associated protein kinase 2</b>                              | <b>P70336.1</b>       |                                         |
| 15         | <b>Rsk90-1</b>                                                      | <b>P18653.1</b>       |                                         |
| 16         | <b>Rsk90-2</b>                                                      | <b>P18654.2</b>       |                                         |
| 17         | <b>serine/threonine-protein kinase 16</b>                           | <b>O88697.3</b>       |                                         |
| 18         | <b>tyrosine-protein kinase JAK1</b>                                 | <b>NP_666257.2</b>    |                                         |
| 19         | <b>tyrosine-protein kinase Lyn</b>                                  | <b>P25911.4</b>       |                                         |
| 20         | <b>tyrosine-protein kinase Yes1</b>                                 | <b>NP_033561.1</b>    |                                         |
| 21         | <b>Protein phosphatase</b>                                          |                       |                                         |
| 22         | <b>phosphatidylinositide phosphatase SAC1</b>                       | <b>Q9EP69.1</b>       |                                         |
| 23         | <b>Inositol (myo)-1(or 4)-monophosphatase 1</b>                     | <b>O55023.1</b>       |                                         |
| 24         | <b>CTD small phosphatase 1</b>                                      | <b>AAH49184.1</b>     |                                         |
| 25         | <b>CTD small phosphatase 2</b>                                      | <b>Q8BX07.1</b>       |                                         |

|    |                                                                                  |                       |   |
|----|----------------------------------------------------------------------------------|-----------------------|---|
| 26 | <b>inorganic pyrophosphatase 1</b>                                               | <b>NP_080714.2</b>    |   |
| 27 | <b>inorganic pyrophosphatase 2, mitochondrial precursor</b>                      | <b>NP_666253.1</b>    |   |
| 28 | <b>inositol polyphosphate-5-phosphatase A</b>                                    | <b>NP_001120835.1</b> |   |
| 29 | <b>PP 2A 65 kDa regulatory subunit A beta</b>                                    | <b>NP_082890.2</b>    |   |
| 30 | <b>PP 2A regulatory subunit B (PR 53)</b>                                        | <b>CAM23293.1</b>     |   |
| 31 | <b>PP2 2, regulatory subunit B (B56), delta</b>                                  | <b>AAH10716.</b>      |   |
| 32 | <b>PP2A 55 kDa regulatory subunit B alpha</b>                                    | <b>NP_082308.1</b>    |   |
| 33 | <b>PP2A 65 kDa regulatory subunit A alpha</b>                                    | <b>NP_058587.1</b>    |   |
| 34 | <b>protein phosphatase 1A</b>                                                    | <b>NP_032936.1</b>    |   |
| 35 | <b>SHP2</b>                                                                      | <b>NP_035331.3</b>    |   |
|    |                                                                                  |                       |   |
|    | <b>GTPase protien</b>                                                            |                       |   |
| 1  | <b>H-RAS</b>                                                                     | <b>Q61411.2</b>       |   |
| 2  | <b>GTP-binding nuclear protein Ran, testis-specific isoform</b>                  | <b>Q61820.1</b>       |   |
| 3  | <b>GTP-binding protein SAR1a</b>                                                 | <b>NP_033146.1</b>    |   |
| 4  | <b>guanine nucleotide binding protein (G protein), beta polypeptide 2 like 1</b> | <b>P68040.3</b>       |   |
| 5  | <b>Guanine nucleotide binding protein, alpha 11</b>                              | <b>AAH11169.1</b>     |   |
| 6  | <b>Guanine nucleotide binding protein, alpha 13</b>                              | <b>AAH57665.1</b>     |   |
| 7  | <b>Guanine nucleotide binding protein, alpha 14</b>                              | <b>NP_032163.3</b>    |   |
| 8  | <b>Guanine nucleotide binding protein, alpha q</b>                               | <b>AAH57583.1</b>     |   |
| 9  | <b>guanine nucleotide binding protein, alpha stimulating complex</b>             | <b>AAH80816.1</b>     |   |
| 10 | <b>guanine nucleotide-binding protein G(i) subunit alpha-2</b>                   | <b>P08752.5</b>       |   |
| 11 | <b>guanine nucleotide-binding protein G(k) subunit alpha</b>                     | <b>NP_034436.1</b>    |   |
| 12 | <b>guanine nucleotide-binding protein G(o) subunit alpha</b>                     | <b>NP_001106855.1</b> |   |
| 13 | <b>R-Ras</b>                                                                     | <b>NP_033127.1</b>    |   |
| 14 | <b>R-Ras2</b>                                                                    | <b>P62071.1</b>       | x |
| 15 | <b>IQ GAP 1</b>                                                                  | <b>AAF60344.1</b>     | x |
| 16 | <b>IQ GAP 3</b>                                                                  | <b>AAI51103.1</b>     |   |
| 17 | <b>rab GDP dissociation inhibitor alpha</b>                                      | <b>NP_034403.1</b>    |   |
| 18 | <b>rab GDP dissociation inhibitor beta</b>                                       | <b>NP_032138.3</b>    |   |

|    |                                                   |             |   |
|----|---------------------------------------------------|-------------|---|
| 19 | <b>Rab-1</b>                                      | NP_033022.1 | x |
| 20 | <b>Rab-14</b>                                     | NP_080973.1 |   |
| 21 | <b>Rab-18</b>                                     | P35293.2    |   |
| 22 | <b>Rab-1b</b>                                     | NP_083852.1 |   |
| 23 | <b>Rab-2a</b>                                     | NP_067493.1 |   |
| 24 | <b>Rab-34</b>                                     | NP_258436.2 |   |
| 25 | <b>Rab-35</b>                                     | BAF02893.1  |   |
| 26 | <b>Rab-5a</b>                                     | NP_080163.1 |   |
| 27 | <b>Rab-5b</b>                                     | AAI37576.1  |   |
| 28 | <b>Rab-5c</b>                                     | AAH29678.1  |   |
| 29 | <b>Rab-7</b>                                      |             |   |
| 30 | <b>Ran-specific GTPase-activating protein</b>     | P34022.2    |   |
| 31 | <b>ras-related C3 botulinum toxin substrate 1</b> | NP_033033.1 |   |
| 32 | <b>ras-related GTP-binding protein D</b>          | NP_081767.2 |   |
| 33 | <b>Ral-A</b>                                      | NP_062364.3 |   |
| 34 | <b>Ral-B</b>                                      | NP_071722.1 |   |
| 35 | <b>Rap-2a</b>                                     | NP_083795.2 |   |
| 36 | <b>Rap-2b</b>                                     | NP_082988.1 |   |
| 37 | <b>Rap-2c</b>                                     | NP_766001.1 |   |
| 38 | <b>GTP-binding protein 9</b>                      | Q9CZ30.1    |   |
| 39 | <b>K-RAS</b>                                      | P32883.1    |   |
|    |                                                   |             |   |
|    |                                                   |             |   |
|    | <b>CELL STRUCTURAL PROTEIN</b>                    |             |   |
| 1  | <b>Cytoskeleton proteins</b>                      |             |   |
| 2  | <b>actin, alpha skeletal muscle</b>               | NP_033736.1 |   |
| 3  | <b>actin, cytoplasmic 1</b>                       | NP_031419.1 |   |
| 4  | <b>actin, cytoplasmic 2</b>                       | NP_033739.1 |   |
| 5  | <b>actin-related protein 2</b>                    | NP_666355.1 |   |
| 6  | <b>alpha-actinin-4</b>                            | NP_068695.1 |   |
| 7  | <b>annexin A2</b>                                 | NP_031611.1 |   |

|    |                                                             |                       |          |
|----|-------------------------------------------------------------|-----------------------|----------|
| 8  | <b>annexin A4</b>                                           | <b>P97429.4</b>       |          |
| 9  | <b>annexin A5</b>                                           | <b>NP_033803.1</b>    |          |
| 10 | <b>annexin A6</b>                                           | <b>NP_038500.2</b>    |          |
| 11 | <b>ARP3 actin-related protein 3</b>                         | <b>NP_001192315.1</b> |          |
| 12 | <b>calnexin</b>                                             | <b>NP_001103970.1</b> |          |
| 13 | <b>Catenin (cadherin associated protein), delta 1</b>       | <b>P30999.2</b>       |          |
| 14 | <b>cathepsin B</b>                                          | <b>P10605.2</b>       |          |
| 15 | <b>cathepsin L1</b>                                         | <b>P06797.2</b>       |          |
| 16 | <b>cathepsin Z</b>                                          | <b>AAF13144.1</b>     |          |
| 17 | <b>cathepsin Z</b>                                          | <b>AAF13144.1</b>     |          |
| 18 | <b>contactin-associated protein 1</b>                       | <b>O54991.2</b>       |          |
| 19 | <b>contactin-associated protein 1</b>                       | <b>O54991.2</b>       |          |
| 20 | <b>Cytoplasmic dynein heavy chain 1</b>                     | <b>Q9JHU4.2</b>       |          |
| 21 | <b>Cytoskeleton-associated protein 4</b>                    | <b>Q8BMK4.2</b>       |          |
| 22 | <b>Dynamin 1-like</b>                                       | <b>AAH85843.1</b>     |          |
| 23 | <b>Dysferlin (Dystrophy-associated fer-1-like protein)</b>  | <b>Q9ESD7.3</b>       |          |
| 24 | <b>F-actin-capping protein subunit alpha-2</b>              | <b>NP_031630.1</b>    |          |
| 25 | <b>F-actin-capping protein subunit beta</b>                 | <b>P47757.3</b>       |          |
| 26 | <b>Fascin (actin bunding protein)</b>                       | <b>NP_032010.2</b>    |          |
| 27 | <b>filamin-A</b>                                            | <b>NP_034357.2</b>    |          |
| 28 | <b>filamin-B</b>                                            | <b>NP_598841.1</b>    |          |
| 29 | <b>FYVE and coiled-coil domain-containing protein 1</b>     | <b>NP_001103723.1</b> |          |
| 30 | <b>Gelsolin</b>                                             | <b>AAH23143.</b>      | <b>x</b> |
| 31 | <b>Gelsolin</b>                                             | <b>AAH23143.</b>      |          |
| 32 | <b>Kif5B</b>                                                | <b>Q61768.3</b>       |          |
| 33 | <b>Metadherin (protein LYRIC)</b>                           | <b>Q80WJ7.1</b>       |          |
| 34 | <b>myoferlin</b>                                            | <b>P35918.1</b>       |          |
| 35 | <b>myosin, heavy polypeptide 10, non-muscle (myosin 10)</b> | <b>Q61879.2</b>       |          |
| 36 | <b>myosin-11</b>                                            | <b>O08638.1</b>       |          |
| 37 | <b>myosin-9</b>                                             | <b>Q8VDD5.4</b>       | <b>x</b> |

|    |                                                                           |                    |   |
|----|---------------------------------------------------------------------------|--------------------|---|
| 38 | <b>myosin-lb</b>                                                          | <b>P46735.3</b>    |   |
| 39 | <b>myosin-lc</b>                                                          | <b>Q9WTI7.2</b>    |   |
| 40 | <b>neural cell adhesion molecule 1 (N-Cam1, CD56)</b>                     | <b>P13595.3</b>    |   |
| 41 | <b>Neuropilin 1</b>                                                       | <b>P97333.2</b>    | x |
| 42 | <b>phosphatidylinositol-binding clathrin assembly protein</b>             | <b>NP_666306.2</b> |   |
| 43 | <b>plastin-3</b>                                                          | <b>Q99K51.3</b>    |   |
| 44 | <b>presenilin-1</b>                                                       | <b>P49769.1</b>    |   |
| 45 | <b>protein furry homolog-like</b>                                         | <b>NP_082470.2</b> |   |
| 46 | <b>talin 1 (Focal adhesion protein )</b>                                  | <b>NP_035732.2</b> |   |
| 47 | <b>talin 2</b>                                                            | <b>Q71LX4.3</b>    |   |
| 48 | <b>tubulin alpha-1A</b>                                                   | <b>P68369.1</b>    |   |
| 49 | <b>tubulin beta-2B</b>                                                    | <b>Q9CWF2.1</b>    |   |
| 50 | <b>Tubulin, beta 4</b>                                                    | <b>Q9D6F9.3</b>    |   |
| 51 | <b>Tubulin, beta 5</b>                                                    | <b>P99024.1</b>    | x |
| 52 | <b>utrophin</b>                                                           | <b>NP_035812.3</b> |   |
| 53 | <b>Vimentin</b>                                                           | <b>NP_035831.2</b> |   |
| 54 | <b>vinculin</b>                                                           | <b>Q64727.4</b>    |   |
| 55 | <b>endophilin-B1 (SH3-domain GRB2-like B1)</b>                            | <b>Q9JK48.1</b>    |   |
| 56 | <b>Chaperone proteins</b>                                                 |                    |   |
| 57 | <b>chaperonin containing T-complex protein 1 subunit beta , subunit 2</b> | <b>P80314.4</b>    |   |
| 58 | <b>chaperonin containing T-complex protein 1 subunit delta</b>            | <b>P80315.3</b>    |   |
| 59 | <b>chaperonin containing T-complex protein 1 subunit epsilon</b>          | <b>P80316.1</b>    |   |
| 60 | <b>chaperonin containing T-complex protein 1 subunit zeta</b>             | <b>P80317.3</b>    |   |
| 61 | <b>chaperonin containing T-complex protein 1 subunit theta</b>            | <b>P42932.3</b>    |   |
| 62 | <b>DnaJ (Hsp40) homolog, subfamily C, member 11</b>                       | <b>NP_766292.2</b> |   |
| 63 | <b>DnaJ (Hsp40) homolog, subfamily C, member 13</b>                       |                    |   |
| 64 | <b>DnaJ (Hsp40) homolog, subfamily C, member 5</b>                        | <b>P60904.1</b>    |   |
| 65 | <b>DnaJ (Hsp40) homolog, subfamily C, member 7</b>                        |                    |   |
| 66 | <b>Heat shock protein 90, alpha (cytosolic), class A member 1</b>         | <b>P07901.4</b>    |   |
| 67 | <b>Heat shock protein 90 alpha (cytosolic), class B member 1</b>          | <b>P11499.3</b>    |   |

|    |                                                               |                |   |
|----|---------------------------------------------------------------|----------------|---|
| 68 | Heat shock protein 90, beta (Grp94), member 1                 | P08113.2       |   |
| 69 | heat shock 70 kDa protein 1-like                              | P16627.4       |   |
| 70 | heat shock protein 4                                          | Q61316.1       |   |
| 71 | heat shock protein 5 (Glucose regulated protein 70kD)         | P20029.3       |   |
| 72 | heat shock protein 8                                          | P63017.1       |   |
| 73 | heat shock protein 9 (mitochondrial)                          | P38647.2       |   |
| 74 | 60 kDa heat shock protein, mitochondrial                      | P63038.1       |   |
|    | Membrane associated proteins                                  |                | x |
|    | adipocyte plasma membrane-associated protein                  | NP_082253.1    | x |
| 1  | Caveolin 1, caveolae protein                                  | P49817.1       |   |
| 2  | Caveolin 2, caveolae protein                                  | NP_058596.1    |   |
| 3  | CDC151                                                        | O35566.2       |   |
| 4  | CD36 antigen                                                  | P41731.2       |   |
| 5  | CD3-epsilon-associated protein                                | O15446.1       |   |
| 6  | CD44 antigen (Extracellular matrix receptor III)              | P15379.3       |   |
| 7  | CD63 antigen                                                  | NP_001036045.1 |   |
| 8  | CD81                                                          | P35762.1       | x |
| 9  | Chromaffin granule amine transporter                          | Q8R090.1       | x |
| 10 | flotillin 1                                                   | NP_032053.1    |   |
| 11 | flotillin 2                                                   | NP_001035493.1 |   |
| 12 | Golgi integral membrane protein 4                             | Q8BXA1.1       |   |
| 13 | integral membrane protein 2b                                  | O89051.1       |   |
| 14 | integrin alpha 6                                              | Q61739.3       |   |
| 15 | Integrin alpha FG-GAP repeat containing 2                     | NP_598688.1    |   |
| 16 | lysosome membrane protein 2                                   | O35114.3       |   |
| 17 | membrane-associated progesterone receptor component 1         | NP_058063.2    |   |
| 18 | Membrane-associated progesterone receptor component 2         | Q80UU9.2       |   |
| 19 | mitochondrial carrier homolog 1                               | AAH27274.      |   |
| 20 | mitochondrial carrier homolog 2                               | NP_062732.1    |   |
| 21 | mitochondrial import inner membrane translocase subunit TIM50 | 9D880.1        |   |

|    |                                                           |                |   |
|----|-----------------------------------------------------------|----------------|---|
| 22 | mitochondrial import receptor subunit TOM70               | NP_613065.2    |   |
| 23 | Neuropilin 1                                              | P97333.2       |   |
| 24 | palmitoylated membrane protein 5                          | CAX15594.1     |   |
| 25 | palmitoylated membrane protein 6                          | AAI45365.1     |   |
| 26 | perilipin-4 (plasma membrane associated protein)          | O88492.2       |   |
| 27 | peroxisomal membrane protein 11B                          | Q9Z210.1       | x |
| 28 | peroxisomal membrane protein 11C                          | Q6P6M5.2       |   |
| 29 | presenilin-1                                              | P49769.1       |   |
| 30 | SID1 transmembrane family member 2                        | Q8CIF6.1       |   |
| 31 | sideroflexin-1                                            | NP_081600.1    | x |
| 32 | sideroflexin-3                                            | Q91V61.1       |   |
| 33 | syntaxin 6                                                | Q9JKK1.1       | x |
| 34 | syntaxin 8                                                | O70439.3       |   |
| 35 | syntaxin binding protein 3A (munc18c)                     | Q60770.1       |   |
| 36 | syntaxin12                                                | Q9ER00.1       |   |
| 37 | transmembrane protein 115                                 | NP_062678.1    |   |
| 38 | transmembrane protein 120a                                | NP_766129.1    |   |
| 39 | transmembrane protein 120b                                | NP_001034812.1 |   |
| 40 | transmembrane protein 134                                 | NP_001072117.1 |   |
| 41 | transmembrane protein 168                                 | NP_083266.1    |   |
| 42 | transmembrane protein 33                                  | NP_084384.1    |   |
| 43 | transmembrane protein 38b                                 | NP_082329.1    |   |
| 44 | transmembrane protein 55a                                 | NP_082540.1    |   |
| 45 | transmembrane protein 55b                                 | NP_001028443.1 |   |
| 46 | transmembrane protein 63a                                 | NP_659043.1    |   |
| 47 | transmembrane protein87a                                  | NP_776095.2    |   |
| 48 | transitional endoplasmic reticulum ATPase                 | Q01853.4       |   |
| 49 | transmembrane anterior posterior transformation protein 1 | Q4VBD2.2       |   |
| 50 | transmembrane emp24 domain-containing protein 1           | NP_034874.2    | x |
| 51 | tubulin-specific chaperone D                              | Q8BYA0.1       |   |



|    |                                                                                  |                       |          |
|----|----------------------------------------------------------------------------------|-----------------------|----------|
| 52 | <b>vesicle-associated membrane protein 7</b>                                     | <b>NP_035645.1</b>    |          |
| 53 | <b>Erythrocyte band 7 integral membrane protein (Stomatin)</b>                   | <b>P54116.3</b>       | <b>x</b> |
| 54 | <b>Reticulon-3</b>                                                               | <b>Q9ES97.2</b>       |          |
| 55 | <b>synaptosomal-associated protein 23</b>                                        | <b>NP_001171263.1</b> |          |
| 56 | <b>N-ethylmaleimide sensitive fusion protein attachment protein alpha</b>        | <b>Q9DB05.1</b>       |          |
| 57 | <b>neuroblastoma-amplified protein (ER protein)</b>                              | <b>NP_081982.1</b>    |          |
|    | <b>Transporter</b>                                                               |                       |          |
| 1  | <b>adenosine 3'-phospho 5'-phosphosulfate transporter 1</b>                      | <b>NP_082938.1</b>    |          |
| 2  | <b>ADP/ATP translocase 1</b>                                                     | <b>NP_031476.3</b>    |          |
| 3  | <b>ADP/ATP translocase 2</b>                                                     | <b>NP_031477.1</b>    |          |
| 4  | <b>ataxin 10</b>                                                                 | <b>P28658.2</b>       |          |
| 5  | <b>ATP synthase subunit alpha, mitochondrial precursor</b>                       | <b>P_031531.1</b>     |          |
| 6  | <b>ATP synthase subunit beta, mitochondrial precursor</b>                        | <b>NP_058054.2</b>    |          |
| 7  | <b>ATP synthase subunit O, mitochondrial precursor</b>                           | <b>NP_613063.1</b>    |          |
| 8  | <b>ATP synthase, H<sup>+</sup> transporting, mitochondrial F1 complex, gamma</b> | <b>CAM13922.1</b>     |          |
| 9  | <b>ATPase, class II, type 9A</b>                                                 | <b>CAM15667.1</b>     |          |
| 10 | <b>ATP-binding cassette sub-family A member 1</b>                                | <b>NP_038482.3</b>    |          |
| 11 | <b>ATP-binding cassette sub-family D member 3</b>                                | <b>P_033017.2</b>     |          |
| 12 | <b>ATP-binding cassette sub-family E member 1</b>                                | <b>NP_056566.2</b>    |          |
| 13 | <b>ATP-binding cassette sub-family G member 2</b>                                | <b>NP_036050.1</b>    |          |
| 14 | <b>ATP-binding cassette, sub-family C (CFTR/MRP), member 10</b>                  | <b>AAI50819.1</b>     |          |
| 15 | <b>ATP-binding cassette, sub-family C (CFTR/MRP), member 4 isoform 3</b>         | <b>NP_001157148.1</b> |          |
| 16 | <b>Chloride intracellular channel protein 1</b>                                  | <b>Q9Z1Q5.3</b>       |          |
| 17 | <b>Chromaffin granule amine transporter</b>                                      | <b>Q8R090.1</b>       |          |
| 18 | <b>copper-transporting ATPase 1 isoform 1</b>                                    | <b>NP_001103227.1</b> |          |
| 19 | <b>exportin 1</b>                                                                | <b>Q6P5F9.1</b>       |          |
| 20 | <b>exportin 2</b>                                                                | <b>Q9ERK4.1</b>       | <b>x</b> |
| 21 | <b>Glut1</b>                                                                     | <b>P17809.4</b>       |          |
| 22 | <b>Glut4</b>                                                                     | <b>P14142.3</b>       |          |
| 23 | <b>H(+)/Cl(-) exchange transporter 7 (Chloride channel protein 7)</b>            | <b>O70496.1</b>       |          |

|    |                                                                              |                       |          |
|----|------------------------------------------------------------------------------|-----------------------|----------|
| 24 | <b>importin 7</b>                                                            | <b>NP_852658.2</b>    |          |
| 25 | <b>importin 9</b>                                                            | <b>AAH98508.1</b>     |          |
| 26 | <b>importin-5</b>                                                            | <b>NP_076068.1</b>    |          |
| 27 | <b>Karyopherin (importin) beta 1</b>                                         | <b>P70168.2</b>       |          |
| 28 | <b>long-chain fatty acid transport protein 1</b>                             | <b>NP_036107.1</b>    |          |
| 29 | <b>loride intracellular channel protein 4</b>                                | <b>Q9QYB1.3</b>       | <b>x</b> |
| 30 | <b>loride intracellular channel protein 4</b>                                | <b>Q9QYB1.3</b>       | <b>x</b> |
| 31 | <b>metal transporter CNNM2 (Cyclin-M2)</b>                                   | <b>Q3TWN3.3</b>       | <b>x</b> |
| 32 | <b>metal transporter CNNM2 (Cyclin-M2)</b>                                   | <b>Q3TWN3.3</b>       | <b>x</b> |
| 33 | <b>mitochondrial glutamate carrier 1</b>                                     | <b>NP_001171047.1</b> |          |
| 34 | <b>mitochondrial import inner membrane translocase subunit TIM50</b>         | <b>9D880.1</b>        |          |
| 35 | <b>neutral amino acid transporter B(0)</b>                                   | <b>NP_033227.2</b>    | <b>x</b> |
| 36 | <b>phosphate carrier protein, mitochondrial</b>                              | <b>NP_598429.1</b>    |          |
| 37 | <b>phosphatidylinositol transfer protein, beta</b>                           | <b>P53811.2</b>       |          |
| 38 | <b>sarcoplasmic/endoplasmic reticulum calcium ATPase 1</b>                   | <b>NP_031530.2</b>    |          |
| 39 | <b>sarcoplasmic/endoplasmic reticulum calcium ATPase 2</b>                   | <b>NP_033852.1</b>    |          |
| 40 | <b>sodium/hydrogen exchanger 1</b>                                           | <b>NP_058677.1</b>    |          |
| 41 | <b>sodium/myo-inositol cotransporter</b>                                     | <b>NP_059087.2</b>    |          |
| 42 | <b>sodium-dependent multivitamin transporter</b>                             | <b>NP_001171093.1</b> | <b>x</b> |
| 43 | <b>sodium-independent sulfate anion transporter</b>                          | <b>NP_848858.2</b>    |          |
| 44 | <b>Solute carrier family 25 (mitochondrial carrier, citrate transporter)</b> | <b>NP_694790.1</b>    |          |
| 45 | <b>mitochondrial carrier, dicarboxylate transporter, member 10</b>           | <b>CAM27052.1</b>     |          |
| 46 | <b>mitochondrial carrier; oxoglutarate carrier, member 11</b>                | <b>NP_077173.1</b>    |          |
| 47 | <b>sodium/hydrogen exchanger, isoform 6</b>                                  | <b>NP_766368.2</b>    |          |
| 48 | <b>Transferrin receptor</b>                                                  | <b>Q62351.1</b>       |          |
| 49 | <b>transportin-2</b>                                                         | <b>NP_001116315.1</b> |          |
| 50 | <b>transportin-3</b>                                                         | <b>NP_796270.2</b>    |          |
| 51 | <b>voltage-dependent anion channel 1</b>                                     | <b>Q60932.3</b>       |          |
| 52 | <b>voltage-dependent anion channel 2</b>                                     | <b>Q60930.2</b>       |          |
| 53 | <b>voltage-dependent anion channel 3</b>                                     | <b>Q60931.1</b>       | <b>x</b> |

|    |                                                            |                |   |
|----|------------------------------------------------------------|----------------|---|
| 54 | V-type proton ATPase 116 kDa subunit a isoform 1 isoform 4 | CAM19438.1     |   |
| 55 | V-type proton ATPase 116 kDa subunit a isoform 2           | NP_035726.2    |   |
| 56 | V-type proton ATPase catalytic subunit A                   | NP_031534.2    | x |
| 57 | <b>VESICLE TRAFFICKING</b>                                 |                | x |
| 58 | AP-1 complex subunit gamma-1                               | NP_033807.2    |   |
| 59 | Adaptor protein complex AP-2 mu1                           | AAH94510.1     |   |
| 60 | Adaptor protein complex AP-2, alpha 1 subunit              | NP_031484.1    | x |
| 61 | TBC1D4 (AS160)                                             | Q8BYJ6.2       |   |
| 62 | Adaptor protein complex AP-2, beta1 subunit                | NP_001030931.1 |   |
| 63 | Coatomer subunit alpha                                     | Q8CIE6.2       |   |
| 64 | coatomer subunit beta 1                                    | Q9JIF7.1       |   |
| 65 | coatomer subunit beta 2                                    | O55029.2       |   |
| 66 | coatomer subunit epsilon                                   | O89079.3       |   |
| 67 | coatomer subunit gamma isoform 1                           | AAH08553.1     |   |
| 68 | perilipin-4 (plasma membrane associated protein)           | O88492.2       | x |
| 69 | plastin-3                                                  | Q99K51.3       |   |
| 70 | plectin 1                                                  | NP_958791.2    |   |
| 71 | presenilin-1                                               | P49769.1       |   |
| 72 | protein transport protein Sec23B                           | NP_001239474.1 | x |
| 73 | protein transport protein Sec31A                           | NP_081245.1    |   |
| 74 | SAM domain and HD domain, 1                                | Q60710.2       |   |
| 75 | Scavenger receptor class B, member 1                       | NP_058021.1    |   |
| 76 | COPII coat assembly protein- protein transporter)          | CAM20308.1     |   |
| 77 | Sec24 related gene family, member C                        | AAH40370.1     |   |
| 78 | Sec24 related gene family, member D                        | AAH67020.1     |   |
| 79 | secretory carrier-associated membrane protein 1            | NP_083429.1    |   |
| 80 | secretory carrier-associated membrane protein 2            |                |   |
| 81 | secretory carrier-associated membrane protein 3            |                | x |
| 82 | secretory carrier-associated membrane protein 4            |                |   |
| 83 | Sortilin 1 (Neurotensin receptor 3)                        | Q6PHU5.1       |   |

|    |                                                                       |                       |   |
|----|-----------------------------------------------------------------------|-----------------------|---|
| 84 | <b>sorting and assembly machinery component 50 homolog</b>            | <b>NP_848729.1</b>    |   |
| 85 | <b>spectrin alpha chain, brain isoform 2</b>                          | <b>P16546.4</b>       |   |
| 86 | <b>spectrin beta 2</b>                                                | <b>Q62261.2</b>       |   |
| 87 | <b>vacuolar protein sorting-associated protein 13C</b>                | <b>Q8BX70.2</b>       |   |
| 88 | <b>vacuolar protein sorting-associated protein 35</b>                 | <b>Q9EQH3.1</b>       | x |
| 89 | <b>vesicle transport through interaction with t-SNAREs homolog 1B</b> | <b>O88384.1</b>       |   |
| 90 | <b>vesicle-associated membrane protein 7</b>                          | <b>NP_035645.1</b>    |   |
| 91 | <b>vesicle-trafficking protein SEC22b</b>                             | <b>NP_035472.1</b>    |   |
| 92 | <b>epididymal secretory protein E1</b>                                | <b>NP_075898.1</b>    |   |
| 93 | <b>immunity-related GTPase M protein 1</b>                            | <b>Q60766.1</b>       |   |
|    |                                                                       |                       |   |
|    | <b>PROTEIN DEGRADATION</b>                                            |                       |   |
| 1  | <b>26S protease regulatory subunit 7</b>                              | <b>NP_035318.1</b>    |   |
| 2  | <b>26S protease regulatory subunit 8</b>                              | <b>NP_032976.1</b>    |   |
| 3  | <b>26S proteasome non-ATPase regulatory subunit 1</b>                 | <b>NP_081633.1</b>    |   |
| 4  | <b>26S proteasome non-ATPase regulatory subunit 13</b>                | <b>NP_036005.1</b>    |   |
| 5  | <b>26S proteasome non-ATPase regulatory subunit 14</b>                | <b>NP_067501.2</b>    |   |
| 6  | <b>26S proteasome non-ATPase regulatory subunit 2</b>                 | <b>NP_598862.1</b>    |   |
| 7  | <b>26S proteasome non-ATPase regulatory subunit 3</b>                 | <b>NP_033465.1</b>    |   |
| 8  | <b>26S proteasome non-ATPase regulatory subunit 4</b>                 | <b>NP_032977.1</b>    |   |
| 9  | <b>26S proteasome non-ATPase regulatory subunit 5</b>                 | <b>NP_542121.2</b>    |   |
| 10 | <b>E3 ubiquitin-protein ligase NEDD4</b>                              | <b>P46935.3</b>       |   |
| 11 | <b>E3 ubiquitin-protein ligase UBR4</b>                               | <b>NP_001153791.1</b> |   |
| 12 | <b>hect domain and RCC1-like domain 1</b>                             | <b>NP_663592.3</b>    |   |
| 13 | <b>HECT, UBA and WWE domain containing 1</b>                          | <b>NP_067498.4</b>    |   |
| 14 | <b>NEDD8-conjugating enzyme</b>                                       | <b>Q8C878.2</b>       |   |
| 15 | <b>probable E3 ubiquitin-protein ligase HERC4 isoform 1</b>           | <b>NP_084390.1</b>    |   |
| 16 | <b>proteasome activator complex subunit 2</b>                         | <b>NP_035320.1</b>    |   |
| 17 | <b>proteasome activator complex subunit 4</b>                         | <b>NP_598774.2</b>    |   |
| 18 | <b>proteasome subunit alpha type-1</b>                                | <b>NP_036095.1</b>    |   |

|    |                                                          |             |  |
|----|----------------------------------------------------------|-------------|--|
| 19 | proteasome subunit alpha type-3                          | NP_035314.3 |  |
| 20 | proteasome subunit alpha type-6                          | NP_036098.1 |  |
| 21 | proteasome subunit beta type-1                           | NP_035315.1 |  |
| 22 | proteasome subunit beta type-2                           | NP_036100.3 |  |
| 23 | proteasome subunit beta type-3                           | NP_036101.1 |  |
| 24 | proteasome subunit beta type-5                           | NP_035316.1 |  |
| 25 | sequestosome-1 (ubiquitin binding protein p62)           | Q64337.1    |  |
| 26 | SUMO-activating enzyme subunit 2                         | Q9Z1F9.1    |  |
| 27 | Ubiquinol-cytochrome c reductase, Rieske iron-sulfur 1   | Q9CR68.1    |  |
| 28 | ubiquitin carboxyl-terminal hydrolase 4                  | P35123.3    |  |
| 29 | ubiquitin carboxyl-terminal hydrolase 4 ( thiolesterase) | P35123.3    |  |
| 30 | ubiquitin c-terminal hydrolase isozyme L4                | P58321.1    |  |
| 31 | Ubiquitin protein ligase E3A                             | O08759.1    |  |
| 32 | Ubiquitin specific peptidase 19                          | Q3UJD6.1    |  |
| 33 | Ubiquitin specific peptidase 5 (isopeptidase T)          | P56399.1    |  |
| 34 | ubiquitin specific peptidase 9, X chromosome             | P70398.2    |  |
| 35 | Ubiquitin thioesterase OTUB1(Deubiquitinating enzyme )   | Q7TQI3.2    |  |
| 36 | ubiquitin-conjugating enzyme E2 K                        | P61087.3    |  |
| 37 | ubiquitin-like modifier activating enzyme 1              | Q02053.1    |  |
| 38 | Ubiquitin-like modifier activating enzyme 6              | Q8C7R4.1    |  |
| 39 | ubiquitin-like modifier-activating enzyme 5              | Q8VE47.2    |  |
| 40 | ubiquitin-like modifier-activating enzyme 7              | NP_076227.1 |  |
| 41 | ubiquitin-like modifier-activating enzyme ATG7 (         | NP_083111.1 |  |
| 42 | ubiquitin-like-conjugating enzyme ATG3                   | NP_080678.1 |  |
| 43 | Ubiquitin thioesterase OTUB1                             | Q7TQI3.2    |  |
| 44 | Peptidases                                               |             |  |
| 45 | a disintegrin and metallopeptidase domain 10             | NP_031425.2 |  |
| 46 | Aminopeptidase-like protein 1                            | Q6NSR8.1    |  |
| 47 | Arginyl aminopeptidase (aminopeptidase B)                | Q8VCT3.2    |  |
| 48 | aspartyl aminopeptidase                                  | Q9Z2W0.2    |  |

|    |                                                             |                       |   |
|----|-------------------------------------------------------------|-----------------------|---|
| 49 | <b>Branched chain aminotransferase 2, mitochondrial</b>     | <b>AAH48072.1</b>     | x |
| 50 | <b>cytosolic non-specific dipeptidase [Mus musculus]</b>    | <b>Q9D1A2.1</b>       |   |
| 51 | <b>endoplasmic reticulum metallopeptidase 1</b>             | <b>NP_001074682.1</b> |   |
| 52 | <b>legumain (lysosomal endopeptidase)</b>                   | <b>O89017.1</b>       |   |
| 53 | <b>Leucine aminopeptidase 3</b>                             | <b>Q9CPY7.3</b>       |   |
| 54 | <b>leucyl-cystinyl aminopeptidase (IRAP)</b>                | <b>Q3UES3.2</b>       |   |
| 55 | <b>methionine aminopeptidase 2</b>                          | <b>O08663.1</b>       |   |
| 56 | <b>mitochondrial-processing peptidase subunit beta</b>      | <b>Q9CXT8.1</b>       |   |
| 57 | <b>N-acetylated-alpha-linked acidic dipeptidase 2</b>       | <b>Q9CZR2.2</b>       |   |
| 58 | <b>prolyl endopeptidase</b>                                 | <b>NP_035286.1</b>    |   |
| 59 | <b>Puromycin-sensitive aminopeptidase</b>                   | <b>Q11011.2</b>       |   |
| 60 | <b>X-prolyl aminopeptidase (aminopeptidase P) 1</b>         | <b>Q00519.5</b>       |   |
|    |                                                             |                       |   |
| 1  | <b>PROTEIN SYNTHESIS</b>                                    |                       |   |
| 2  | <b>Aspartyl-tRNA synthetase</b>                             | <b>Q922B2.2</b>       |   |
| 3  | <b>Alanyl-tRNA synthetase</b>                               | <b>NP_666329.2</b>    |   |
| 4  | <b>Acyl-CoA synthetase family member 2</b>                  | <b>AAH63269.1</b>     |   |
| 5  | <b>asparagine syntetase</b>                                 | <b>NP_036185.1</b>    |   |
| 6  | <b>L-asparaginase</b>                                       | <b>NP_079886.2</b>    |   |
| 7  | <b>ATP synthase subunit alpha, mitochondrial precursor</b>  | <b>P_031531.1</b>     |   |
| 8  | <b>ATP synthase subunit beta, mitochondrial precursor</b>   | <b>NP_058054.2</b>    |   |
| 9  | <b>bifunctional coenzyme A synthase</b>                     | <b>Q9DBL7.2</b>       |   |
| 10 | <b>Aspartyl-tRNA synthetase</b>                             | <b>Q922B2.2</b>       |   |
| 11 | <b>Eukaryotic translation elongation factor 1 alpha 1</b>   | <b>AAH83069.1</b>     |   |
| 12 | <b>Eukaryotic translation elongation factor 1 alpha 2</b>   | <b>AAH18235.1</b>     |   |
| 13 | <b>Eukaryotic translation elongation factor 1 delta</b>     | <b>AAH79855.1</b>     |   |
| 14 | <b>Eukaryotic translation elongation factor 1 gamma</b>     | <b>AAH83071.1</b>     |   |
| 15 | <b>Eukaryotic translation elongation factor 2</b>           | <b>AAH07152.1</b>     |   |
| 16 | <b>EH domain-containing protein 2</b>                       | <b>NP_694708.2</b>    |   |
| 17 | <b>eukaryotic translation initiation factor 2 subunit 1</b> | <b>NP_080390.1</b>    |   |

|    |                                                                                 |                    |  |
|----|---------------------------------------------------------------------------------|--------------------|--|
| 18 | <b>eukaryotic translation initiation factor 2 subunit 2</b>                     | <b>NP_080306.1</b> |  |
| 19 | <b>eukaryotic translation initiation factor 3 subunit C</b>                     | <b>NP_666312.1</b> |  |
| 20 | <b>eukaryotic translation initiation factor 3 subunit D</b>                     | <b>O70194.2</b>    |  |
| 21 | <b>eukaryotic translation initiation factor 3 subunit E</b>                     | <b>P60229.1</b>    |  |
| 22 | <b>eukaryotic translation initiation factor 3 subunit L</b>                     | <b>NP_660121.2</b> |  |
| 23 | <b>eukaryotic translation initiation factor 4A1</b>                             | <b>NP_659207.1</b> |  |
| 24 | <b>eukaryotic translation initiation factor 6</b>                               | <b>O55135.2</b>    |  |
| 25 | <b>bifunctional aminoacyl-tRNA synthetase</b>                                   | <b>NP_084011.1</b> |  |
| 26 | <b>farnesyl pyrophosphate synthase</b>                                          | <b>NP_608219.1</b> |  |
| 27 | <b>Guanine monphosphate synthetase</b>                                          | <b>AAI38413.1</b>  |  |
| 28 | <b>Ribosomal protein S2</b>                                                     | <b>EDL01859.1</b>  |  |
| 29 | <b>arginyl-tRNA synthetase, cytoplasmic</b>                                     | <b>AAH20132.1</b>  |  |
| 30 | <b>Ribosomal protein 10</b>                                                     | <b>AAH24901.1</b>  |  |
| 31 | <b>60S ribosomal protein L10-like</b>                                           | <b>P86048.1</b>    |  |
| 32 | <b>60S ribosomal protein L15</b>                                                | <b>Q9CZM2.4</b>    |  |
| 33 | <b>60S ribosomal protein L19</b>                                                | <b>P84099.1</b>    |  |
| 34 | <b>60S ribosomal protein L3</b>                                                 | <b>P27659.3</b>    |  |
| 35 | <b>60S ribosomal protein L4</b>                                                 | <b>Q9D8E6.3</b>    |  |
| 36 | <b>60S ribosomal protein L6</b>                                                 | <b>P47911.3</b>    |  |
| 37 | <b>60S ribosomal protein L7</b>                                                 | <b>P14148.2</b>    |  |
| 38 | <b>60S ribosomal protein L8</b>                                                 | <b>P62918.2</b>    |  |
| 39 | <b>60S acidic ribosomal protein P0</b>                                          | <b>P14869.3</b>    |  |
| 40 | <b>dolichyl-diphosphooligosaccharide--protein glycosyltransferase subunit 1</b> | <b>Q91YQ5.1</b>    |  |
| 41 | <b>40S ribosomal protein S2</b>                                                 | <b>NP_032529.2</b> |  |
| 42 | <b>40S ribosomal protein S3</b>                                                 | <b>NP_036182.1</b> |  |
| 43 | <b>40S ribosomal protein S3a</b>                                                | <b>P97351.3</b>    |  |
| 44 | <b>40S ribosomal protein S4, X isoform</b>                                      | <b>P62702.2</b>    |  |
| 45 | <b>90 kDa ribosomal protein S6 kinase 1</b>                                     | <b>P18653.1</b>    |  |
| 46 | <b>90 kDa ribosomal protein S6 kinase 3</b>                                     | <b>P18654.2</b>    |  |
| 47 | <b>40S ribosomal protein S9</b>                                                 | <b>NP_084043.1</b> |  |

|          |                                                                        |                       |  |
|----------|------------------------------------------------------------------------|-----------------------|--|
| 48       | <b>seryl-aminoacyl-tRNA synthetase</b>                                 | <b>P26638.3</b>       |  |
| 49       | <b>threonyl-tRNA synthetase</b>                                        | <b>Q9D0R2.2</b>       |  |
| 50       | <b>elongation factor Tu, mitochondrial</b>                             | <b>Q8BFR5.1</b>       |  |
| 51       | <b>Valyl-tRNA synthetase</b>                                           | <b>Q9Z1Q9.1</b>       |  |
| 52       | <b>tryptophanyl-tRNA synthetase</b>                                    | <b>P32921.2</b>       |  |
|          |                                                                        |                       |  |
| <b>1</b> | <b>LIPID and ENERGY Metabolism</b>                                     |                       |  |
| 2        | <b>6-phosphofructokinase, liver type</b>                               | <b>NP_032852.2</b>    |  |
| 3        | <b>adenylate kinase 2, mitochondrial</b>                               | <b>NP_058591.2</b>    |  |
| 4        | <b>adenylate kinase isoenzyme 4</b>                                    | <b>NP_001171075.1</b> |  |
| 5        | <b>ADP-sugar pyrophosphatase</b>                                       | <b>NP_058614.1</b>    |  |
| 6        | <b>1,4-alpha-glucan-branching enzyme</b>                               | <b>NP_083079.1</b>    |  |
| 7        | <b>2-oxoglutarate dehydrogenase-like, mitochondrial</b>                | <b>NP_001074599.1</b> |  |
| 8        | <b>2-oxoisovalerate dehydrogenase subunit alpha, mitochondrial</b>     | <b>NP_031559.3</b>    |  |
| 9        | <b>2-oxoisovalerate dehydrogenase subunit beta, mitochondrial</b>      | <b>NP_954665.1</b>    |  |
| 10       | <b>3'(2'),5'-bisphosphate nucleotidase 1</b>                           | <b>NP_035924.2</b>    |  |
| 11       | <b>3-hydroxy-3-methylglutaryl-Coenzyme A synthase 1</b>                | <b>Q8JZK9.1</b>       |  |
| 12       | <b>3-hydroxyisobutyrate dehydrogenase, mitochondrial</b>               | <b>Q99L13.1</b>       |  |
| 13       | <b>3-hydroxyisobutyryl-Coenzyme A hydrolase</b>                        | <b>Q8QZS1.1</b>       |  |
| 14       | <b>3-ketoacyl-CoA thiolase A, peroxisomal precursor</b>                | <b>NP_570934.1</b>    |  |
| 15       | <b>3-ketoacyl-CoA thiolase, mitochondrial</b>                          | <b>NP_803421.1</b>    |  |
| 16       | <b>3-oxoacyl-[acyl-carrier-protein] synthase, mitochondrial</b>        | <b>Q9D404.1</b>       |  |
| 17       | <b>4-trimethylaminobutyraldehyde dehydrogenase</b>                     | <b>AAH03297.1</b>     |  |
| 18       | <b>5-aminoimidazole-4-carboxamide ribonucleotide formyltransferase</b> | <b>EDL00264.1</b>     |  |
| 19       | <b>6-phosphogluconate dehydrogenase</b>                                | <b>Q9DCD0.3</b>       |  |
| 20       | <b>a disintegrin and metallopeptidase domain 10</b>                    | <b>NP_031425.2</b>    |  |
| 21       | <b>Abhydrolase domain containing 14b</b>                               | <b>AAH19410.1</b>     |  |
| 22       | <b>abhydrolase domain-containing protein FAM108A</b>                   | <b>NP_663396.1</b>    |  |
| 23       | <b>abhydrolase domain-containing protein FAM108B1</b>                  | <b>NP_666208.2</b>    |  |
| 24       | <b>acetoacetyl-CoA synthetase</b>                                      | <b>NP_084486.1</b>    |  |



|    |                                                                        |                |  |
|----|------------------------------------------------------------------------|----------------|--|
| 25 | acetyl-CoA carboxylase 1                                               | NP_579938.2    |  |
| 26 | acetyl-Coenzyme A carboxylase beta precursor                           | NP_598665.2    |  |
| 27 | acid ceramidase precursor                                              | NP_062708.1    |  |
| 28 | aconitate hydratase, mitochondrial precursor                           | NP_542364.     |  |
| 29 | acyl-CoA dehydrogenase family member 9, mitochondrial                  | NP_766266.3    |  |
| 30 | Acyl-CoA synthetase family member 2                                    | AAH63269.1     |  |
| 31 | acyl-Coenzyme A dehydrogenase family, member 8                         | NP_080138.2    |  |
| 32 | acyl-Coenzyme A oxidase 1, palmitoyl                                   | CAM16380.      |  |
| 33 | acyl-coenzyme A thioesterase 10, mitochondrial precursor               | NP_073727.2    |  |
| 34 | acyl-coenzyme A thioesterase 9, mitochondrial                          | NP_062710.2    |  |
| 35 | adenylosuccinate lyase                                                 | NP_033764.2    |  |
| 36 | ADP-dependent glucokinase precursor                                    | NP_082397.1    |  |
| 37 | ADP-ribosylation factor-like protein 15                                | NP_766183.1    |  |
| 38 | ADP-ribosylation factor-like protein 3                                 | NP_062692.1    |  |
| 39 | alcohol dehydrogenase [NADP+]                                          | NP_067448.1    |  |
| 40 | aldehyde dehydrogenase family 3 member b1                              | NP_080592.2    |  |
| 41 | aldehyde dehydrogenase 4 family, member a1                             | CAM21310.1     |  |
| 42 | aldehyde dedrogenase. Mitochondrial precursor                          | NP_033786.1    |  |
| 43 | aldehyde dehydrogenase family 3 member b2                              | NP_001170909.1 |  |
| 44 | Aldehyde dehydrogenase family6 member a1                               | AAH311148.1    |  |
| 45 | Aldehyde dehydrogenase family 1 , subfamily A1                         | NP_038495.2    |  |
| 46 | Aldehyde dehydrogenase family 1 , subfamily A7                         | NP_036051.1    |  |
| 47 | Aldo-keto reductase family 1, member B3 (aldose reductase)             | AAH85310.1     |  |
| 48 | Aldo-keto reductase family 1, member B7                                | AAH86929.1     |  |
| 49 | aldo-keto reductase family 1, member C-like                            | NP_081858.2    |  |
| 50 | aldo-keto reductase family 7, member A5 (aflatoxin aldehyde reductase) | CAM18543.1     |  |
| 51 | aldolase A retroprotein 2                                              | ABR88098.1     |  |
| 52 | alpha-amino adipic semialdehyde dehydrogenase                          | NP_001120810.1 |  |
| 53 | alpha-enolase                                                          | NP_075608.2    |  |
| 54 | alpha-mannosidase 2C1                                                  | P08003.3       |  |

|    |                                                                            |             |  |
|----|----------------------------------------------------------------------------|-------------|--|
| 55 | alpha-N-acetylglucosaminidase                                              | NP_038820.2 |  |
| 56 | asparagine syntetase                                                       | NP_036185.1 |  |
| 57 | aspartate transcarbamylase, and dihydroorotase                             | NP_076014.1 |  |
| 58 | aspartyl aminopeptidase                                                    | Q9Z2W0.2    |  |
| 59 | ATP citrate lyase                                                          | CAM23025.1  |  |
| 60 | ATP synthase subunit alpha, mitochondrial precursor                        | P_031531.1  |  |
| 61 | ATP synthase subunit beta, mitochondrial precursor                         | NP_058054.2 |  |
| 62 | ATP synthase subunit O, mitochondrial precursor                            | NP_613063.1 |  |
| 63 | ATP synthase, H <sup>+</sup> transporting, mitochondrial F1 complex, gamma | CAM13922.1  |  |
| 64 | ATP-dependent RNA helicase DDX1                                            | Q91VR5.1    |  |
| 65 | beta-glucuronidase                                                         | NP_034498.1 |  |
| 66 | bifunctional coenzyme A synthase                                           | Q9DBL7.2    |  |
| 67 | Bleomycin hydrolase                                                        | AAH24090.1  |  |
| 68 | Brain glycogen phosphorylase                                               | NP_722476.1 |  |
| 69 | C-1-tetrahydrofolate synthase, cytoplasmic                                 | Q922D8.4    |  |
| 70 | Calcium-activated neutral proteinase 1 (calpain 1)                         | O35350.1    |  |
| 71 | Calcium-activated neutral proteinase 2 (calpain 2)                         | O08529.4    |  |
| 72 | Calcium-activated neutral proteinase 5 (calpain 5)                         | NP_031628.1 |  |
| 73 | carbohydrate kinase domain-containing protein isoform 1                    | NP_081271.2 |  |
| 74 | Casein kinase 1, gamma 2                                                   | AAH04839.1  |  |
| 75 | Cytidine monophosphate (UMP-CMP) kinase 1                                  | Q9DBP5.1    |  |
| 76 | cytochrome b5 domain containing 2                                          | Q5SSH8.1    |  |
| 77 | Cytochrome b5 type B                                                       | Q9CQX2.1    |  |
| 78 | cytochrome b-c1 complex subunit 1, mitochondrial                           | Q9CZ13.2    |  |
| 79 | cytochrome b-c1 complex subunit 2, mitochondrial                           | Q9DB77.1    |  |
| 80 | electron transfer flavoprotein subunit alpha, mitochondrial                | NP_663590.3 |  |
| 81 | electron transfer flavoprotein subunit beta                                | NP_080971.2 |  |
| 82 | electron transfer flavoprotein-ubiquinone oxidoreductase, mitochondrial    | NP_080070.2 |  |
| 83 | endoplasmic reticulum-Golgi intermediate compartment protein 1             | NP_080446.1 |  |
| 84 | endoplasmic reticulum-Golgi intermediate compartment protein 3             | NP_079792.1 |  |

|     |                                                                         |                |  |
|-----|-------------------------------------------------------------------------|----------------|--|
| 85  | Erythrocyte band 7 integral membrane protein (Stomatin)                 | P54116.3       |  |
| 86  | dicarbonyl L-xylulose reductase,                                        | Q91X52.2       |  |
| 87  | Dihydrolipoamide branched chain transacylase E2                         | P53395.2       |  |
| 88  | dihydrolipoyl dehydrogenase, mitochondrial                              | O08749.2       |  |
| 89  | Discoidin domain-containing receptor                                    | Q62371.2       |  |
| 90  | dihydropyrimidinase-related protein 2 [                                 | O08553.2       |  |
| 91  | electron transfer flavoprotein subunit alpha, mitochondrial precursor   | NP_663590.3    |  |
| 92  | electron transfer flavoprotein subunit beta                             | NP_080971.2    |  |
| 93  | electron transfer flavoprotein-ubiquinone oxidoreductase, mitochondrial | NP_080070.2    |  |
| 94  | endoplasmic reticulum metalloproteinase 1                               | NP_001074682.1 |  |
| 95  | Endothelin converting enzyme 1                                          | Q4PZA2.1       |  |
| 96  | enoyl Coenzyme A hydratase, short chain, 1, mitochondrial               | Q8BH95.1       |  |
| 97  | enoyl-CoA delta isomerase 1, mitochondrial                              | P42125.1       |  |
| 98  | enoyl-CoA delta isomerase 2, mitochondrial                              | Q9WUR2.2       |  |
| 99  | enoyl-CoA hydratase domain-containing protein 1                         | Q9D9V3.2       |  |
| 100 | enoyl-Coenzyme A delta isomerase 3                                      | NP_081223.1    |  |
| 101 | epoxide hydrolase 2                                                     | NP_031966.2    |  |
| 102 | farnesyl pyrophosphate synthase                                         | NP_608219.1    |  |
| 103 | fatty acid desaturase 3                                                 | NP_068690.3    |  |
| 104 | fatty acid synthase                                                     | NP_032014.3    |  |
| 105 | fatty aldehyde dehydrogenase                                            | NP_031463.2    |  |
| 106 | fructose-bisphosphate aldolase A isoform 2                              | NP_001170779.1 |  |
| 107 | fumarate hydratase, mitochondrial                                       | NP_034339.2    |  |
| 108 | fumarylacetoacetase (Fumarylacetoacetate hydrolase)                     | NP_034306.2    |  |
| 109 | galactokinase                                                           | NP_058601.2    |  |
| 110 | gamma-enolase                                                           | P_038537.1     |  |
| 111 | GCN1 general control of amino-acid synthesis 1-like 1 [                 | NP_766307.2    |  |
| 112 | glucose-6-phosphate 1-dehydrogenase X                                   | NP_032088.1    |  |
| 113 | glutamate dehydrogenase 1, mitochondrial                                | AAH57347.1     |  |
| 114 | glutamate--cysteine ligase catalytic subunit                            | NP_034425.1    |  |

|     |                                                               |                |  |
|-----|---------------------------------------------------------------|----------------|--|
| 115 | glutamic pyruvate transaminase (alanine aminotransferase) 2   | Q8BGT5.1       |  |
| 116 | glutamic pyruvic transaminase 1, soluble,                     | Q8QZR5.3       |  |
| 117 | glutamine synthetase                                          | NP_032157.2    |  |
| 118 | glutathione peroxidase 1                                      | P11352.2       |  |
| 119 | glutathione reductase, mitochondrial                          | NP_034474.4    |  |
| 120 | glutathione S-transferase Mu 5                                | NP_034490.1    |  |
| 121 | glutathione S-transferase omega-1                             | NP_034492.1    |  |
| 122 | glutathione S-transferase P 1                                 | P19157.2       |  |
| 123 | glutathione S-transferase P 2                                 | P46425.2       |  |
| 124 | glutathione transferase zeta 1 (maleylacetoacetate isomerase) | Q9WVL0.1       |  |
| 125 | glyceraldehyde-3-phosphate dehydrogenase, testis-specific     | NP_032111.1    |  |
| 126 | Glycerol-3-phosphate dehydrogenase 1                          | P13707.3       |  |
| 127 | glycerol-3-phosphate dehydrogenase, mitochondrial             | Q64521.2       |  |
| 128 | glycogen debranching enzyme                                   | NP_001074795.1 |  |
| 129 | Glycogen synthase 1                                           | Q9Z1E4.2       |  |
| 130 | glyoxylate reductase/hydroxypyruvate reductase                | Q91Z53.1       |  |
| 131 | guanine deaminase                                             | NP_034396.1    |  |
| 132 | Guanine monphosphate synthetase                               | AAI38413.1     |  |
| 133 | heme oxygenase 1                                              | NP_034572.1    |  |
| 134 | heparan-alpha-glucosaminide N-acetyltransferase               | Q3UDW8.2       |  |
| 135 | hexokinase-1                                                  | P17710.3       |  |
| 136 | hexokinase-2                                                  | O08528.1       |  |
| 137 | hormone-sensitive lipase 1                                    | NP_034849.2    |  |
| 138 | hydroxyacid-oxoacid transhydrogenase, mitochondrial precursor | NP_780445.1    |  |
| 139 | Hydroxyacyl-Coenzyme A dehydrogenase                          | Q61425.2       |  |
| 140 | Hydroxyacyl-Coenzyme A dehydrogenase beta                     | Q99JY0.1       |  |
| 141 | hydroxymethylglutaryl-CoA lyase, mitochondrial                | P38060.2       |  |
| 142 | Hydroxysteroid (17-beta) dehydrogenase 4                      | P51660.3       |  |
| 143 | hydroxysteroid (17-beta)dehydrogenase 12                      | CAM27609.1     |  |
| 144 | hydroxysteroid dehydrogenase like 2                           | NP_077217.2    |  |

|     |                                                                    |                |  |
|-----|--------------------------------------------------------------------|----------------|--|
| 145 | Hydroxysteroid dehydrogenase like protein 1                        | Q8BTX9.1       |  |
| 146 | hypoxanthine-guanine phosphoribosyltransferase                     | Q64531.3       |  |
| 147 | immunoglobulin superfamily member 8                                | Q8R366.2       |  |
| 148 | inorganic pyrophosphatase 1                                        | NP_080714.2    |  |
| 149 | inorganic pyrophosphatase 2, mitochondrial precursor               | NP_666253.1    |  |
| 150 | insulin-degrading enzyme                                           | AAH41675.1     |  |
| 151 | isoamyl acetate-hydrolyzing esterase 1 homolog                     | Q9DB29.1       |  |
| 152 | Isochorismatase domain containing 1                                | AAH16576.1     |  |
| 153 | isocitrate dehydrogenase [NAD] subunit alpha, mitochondrial        | NP_083849.1    |  |
| 154 | isocitrate dehydrogenase [NADP] cytoplasmic                        | NP_001104790.1 |  |
| 155 | isocitrate dehydrogenase [NADP], mitochondrial                     | NP_766599.2    |  |
| 156 | isocitrate dehydrogenase 3, beta subunit                           | NP_570954.1    |  |
| 157 | isopentenyl-diphosphate delta isomerase                            | P58044.1       |  |
| 158 | Isovaleryl-CoA dehydrogenase, mitochondrial                        | Q9JHI5.1       |  |
| 159 | LanC (bacterial lantibiotic synthetase component C)-like protein 2 | Q9JJK2.1       |  |
| 160 | lanosterol synthase ]                                              | NP_666118.1    |  |
| 161 | L-asparaginase                                                     | NP_079886.2    |  |
| 162 | legumain (lysosomal endopeptidase)                                 | O89017.1       |  |
| 163 | leukotriene A-4 hydrolase                                          | P24527.4       |  |
| 164 | LIM and SH3 protein 1                                              | Q61792.1       |  |
| 165 | lipid phosphate phosphohydrolase 3                                 | NP_542122.1    |  |
| 166 | lipoprotein ligase                                                 | P11152.3       |  |
| 167 | L-lactate dehydrogenase A chain                                    | P06151.3       |  |
| 168 | L-lactate dehydrogenase B chain                                    | P16125.2       |  |
| 169 | long-chain specific acyl-CoA dehydrogenase, mitochondrial          | NP_031407.2    |  |
| 170 | long-chain-fatty-acid--CoA ligase 1                                | NP_032007.2    |  |
| 171 | Lysophospholipase 1                                                | P97823.1       |  |
| 172 | lysophospholipase-like protein 1                                   | Q3UFF7.3       |  |
| 173 | malate dehydrogenase, cytoplasmic                                  | P14152.3       |  |
| 174 | malate dehydrogenase, mitochondrial                                | P08249.3       |  |

|     |                                                                       |                |  |
|-----|-----------------------------------------------------------------------|----------------|--|
| 175 | malonyl-CoA decarboxylase, mitochondrial                              | Q99J39.1       |  |
| 176 | medium-chain specific acyl-CoA dehydrogenase, mitochondrial           | NP_031408.1    |  |
| 177 | Mercaptopyruvate sulfurtransferase                                    | Q99J99.3       |  |
| 178 | metalloreductase STEAP3                                               | Q8CI59.1       |  |
| 179 | methionine aminopeptidase 2                                           | O08663.1       |  |
| 180 | methylmalonyl-CoA mutase, mitochondrial                               | P16332.2       |  |
| 181 | mitochondrial 10 formyltetrahydrofolate dehydrogenase                 | NP_705771.2    |  |
| 182 | mitochondrial peptide methionine sulfoxide reductase                  | Q9D6Y7.        |  |
| 183 | mitochondrial-processing peptidase subunit beta                       | Q9CXT8.1       |  |
| 184 | MMS19 nucleotide excision repair protein homolog                      | Q9D071.        |  |
| 185 | monoacylglycerol lipase ABHD12                                        | NP_077785.2    |  |
| 186 | Muscle glycogen phosphorylase                                         | AAH12961.1     |  |
| 187 | Myo-inositol 1-phosphate synthase A1                                  | AAH03458.1     |  |
| 188 | N-acetylated-alpha-linked acidic dipeptidase 2                        | Q9CZR2.2       |  |
| 189 | N-acetylglucosaminyl transferase component Gpi1                       | AAC79574.1     |  |
| 190 | N-acetylneuraminic acid synthase (sialic acid synthase)               | NP_444409.1    |  |
| 191 | NADH dehydrogenase [ubiquinone] flavoprotein 1, mitochondrial         | Q91YT0.1       |  |
| 192 | NADH dehydrogenase [ubiquinone] flavoprotein 2, mitochondrial         | Q9D6J6.2       |  |
| 193 | NADH dehydrogenase [ubiquinone] iron-sulfur protein 1, mitochondrial  | Q91VD9.2       |  |
| 194 | NADH dehydrogenase [ubiquinone] iron-sulfur protein 2, mitochondrial; | Q91WD5.1       |  |
| 195 | NADH dehydrogenase [ubiquinone] iron-sulfur protein 3, mitochondrial  | Q9DCT2.2       |  |
| 196 | NADH dehydrogenase [ubiquinone] iron-sulfur protein 3, mitochondrial  | Q9DC70.1       |  |
| 197 | NADH dehydrogenase [ubiquinone] iron-sulfur protein 3, mitochondrial  | Q8K3J1.1       |  |
| 198 | NADH-cytochrome b5 reductase 3                                        | Q9DCN2.3       |  |
| 199 | NADH-ubiquinone oxidoreductase 75 kDa subunit, mitochondrial          | NP_001153512.1 |  |
| 200 | neutral alpha-glucosidase AB                                          | NP_032086.1    |  |
| 201 | Nicotinamide phosphoribosyltransferase;                               | Q99KQ4.1       |  |
| 202 | ornithine aminotransferase, mitochondrial                             | P29758.1       |  |
| 203 | oxoglutarate dehydrogenase (lipoamide)                                | NP_001239212.1 |  |
| 204 | P450 (cytochrome) oxidoreductase                                      | P37039.2       |  |

|     |                                                                     |                |  |
|-----|---------------------------------------------------------------------|----------------|--|
| 205 | patatin-like phospholipase domain containing protein 2              | Q8BJ56.1       |  |
| 206 | peptidyl-prolyl cis-trans isomerase FKBP8 (FK506-binding protein 8) | NP_001186560.1 |  |
| 207 | Peroxiredoxin-1 (Thioredoxin peroxidase )                           | P35700.1       |  |
| 208 | peroxiredoxin-3                                                     | P20108.1       |  |
| 209 | peroxiredoxin-4                                                     | O08807.1       |  |
| 210 | peroxiredoxin-6                                                     | O08709.3       |  |
| 211 | peroxiredoxin-6 related sequence 1                                  | NP_796230.1    |  |
| 212 | peroxisomal acyl-coenzyme A oxidase 3                               | NP_109646.2    |  |
| 213 | Peroxredoxin-2 (thioredoxin-dependent peroxide reductase)           | Q61171.3       |  |
| 214 | phosphatidylinositol transfer protein, beta                         | P53811.2       |  |
| 215 | Phosphoglucomutase 2                                                | AAH86490.1     |  |
| 216 | Phosphoglycerate mutase 1                                           | Q9DBJ1.3       |  |
| 217 | phosphoglycerate mutase 2                                           | O70250.3       |  |
| 218 | phospholipid scramblase 3                                           | Q9JIZ9.1       |  |
| 219 | phosphoenolpyruvate carboxykinase [GTP], mitochondrial              | Q8BH04.1       |  |
| 220 | Phosphofructokinase, platelet                                       | Q9WUA3.1       |  |
| 221 | phosphoglycerate kinase 1                                           | P09411.4       |  |
| 222 | phosphoglycerate kinase 2                                           | P09041.4       |  |
| 223 | phosphorylase b kinase regulatory subunit beta                      | Q7TSH2.1       |  |
| 224 | phosphopantothenoylcysteine decarboxylase                           | NP_789801.1    |  |
| 225 | Phosphoribosylaminoimidazole carboxylase                            | Q9DCL9.4       |  |
| 226 | pitrilysin metalloprotease 1, mitochondrial                         | Q8K411.1       |  |
| 227 | probable methylthioribulose-1-phosphate dehydratase                 | NP_062709.3    |  |
| 228 | Probable saccharopine dehydrogenase                                 | Q8R127.1       |  |
| 229 | Proliferation-associated protein 2G4                                | P50580.3       |  |
| 230 | proline dehydrogenase                                               | AAD24776.1     |  |
| 231 | prolyl endopeptidase                                                | NP_035286.1    |  |
| 232 | propionyl-CoA carboxylase alpha chain, mitochondrial                | Q91ZA3.2       |  |
| 233 | propionyl-CoA carboxylase beta chain, mitochondrial                 | Q99MN9.2       |  |
| 234 | prostaglandin reductase 2                                           | Q8VDQ1.2       |  |

|     |                                                                          |                |  |
|-----|--------------------------------------------------------------------------|----------------|--|
| 235 | protein disulfide-isomerase (ERp59)                                      | P09103.2       |  |
| 236 | protein disulfide-isomerase A3                                           | P27773.2       |  |
| 237 | protein disulfide-isomerase A4                                           | P08003.3       |  |
| 238 | protein disulfide-isomerase A6                                           | Q922R8.3       |  |
| 239 | protein kinase C and casein kinase II substrate protein 3                | NP_112019.2    |  |
| 240 | protein sprouty homolog 4                                                | Q9WTP2.1       |  |
| 241 | Purine-nucleoside phosphorylase 1                                        | P23492.2       |  |
| 242 | Puromycin-sensitive aminopeptidase                                       | Q11011.2       |  |
| 243 | putative adenosylhomocysteinase 2                                        | NP_663517.2    |  |
| 244 | Pyridoxal (pyridoxine, vitamin B6) kinase                                | Q60925.2       |  |
| 245 | pyruvate kinase isozymes M1/M2                                           | P52480.4       |  |
| 246 | pyruvate carboxylase, mitochondrial                                      | Q05920.1       |  |
| 247 | pyruvate dehydrogenase E1 component subunit alpha, , mitochondrial       | NP_032836.1    |  |
| 248 | pyruvate dehydrogenase E1 component subunit beta, mitochondrial          | Q9D051.1       |  |
| 249 | pyruvate dehydrogenase protein X component, mitochondrial                | Q8BKZ9.1       |  |
| 250 | redox-regulatory protein PAMM                                            | NP_081740.2    |  |
| 251 | ribonuclease inhibitor isoform b                                         | NP_001165572.1 |  |
| 252 | ribose 5-phosphate isomerase                                             | P47968.2       |  |
| 253 | S-adenosylmethionine synthase isoform type-2                             | NQ3THS6.2P     |  |
| 254 | serine (or cysteine) peptidase inhibitor, clade B, member 6a (Serpins)   | Q60854.1       |  |
| 255 | serine (or cysteine) peptidase inhibitor, clade H (serpin H1)            | P19324.3       |  |
| 256 | S-formylglutathione hydrolase                                            | NP_058599.1    |  |
| 257 | short-chain specific acyl-CoA dehydrogenase, mitochondrial               | NP_031409.2    |  |
| 258 | sochorismatase domain-containing protein 2A, mitochondrial               | P85094.1       |  |
| 259 | staphylococcal nuclease and tudor domain containing 1                    | Q78PY7.1       |  |
| 260 | succinate dehydrogenase [ubiquinone] flavoprotein subunit, mitochondrial | Q8K2B3.1       |  |
| 261 | succinate dehydrogenase complex subunit B                                | Q9CQA3.1       |  |
| 262 | succinyl-CoA ligase [ADP-forming] subunit beta, mitochondrial            | NP_035636.1    |  |
| 263 | Sulfide:quinone oxidoreductase, mitochondrial                            | Q9R112.3       |  |
| 264 | superoxide dismutase 2, mitochondrial                                    | P09671.3       |  |



|     |                                                                |             |  |
|-----|----------------------------------------------------------------|-------------|--|
| 265 | Synaptotagmin binding, cytoplasmic RNA interacting protein     | Q9WUM5.4    |  |
| 266 | Thioredoxin domain containing 14                               | Q8C838.1    |  |
| 267 | thioredoxin domain-containing protein 5                        | Q9D710.1    |  |
| 268 | thioredoxin reductase 1                                        | Q8CDN6.3    |  |
| 269 | thioredoxin-like protein 1                                     | Q91W90.2    |  |
| 270 | thioredoxin-related transmembrane protein 1                    | NP_620097.1 |  |
| 271 | thioredoxin-related transmembrane protein 4                    | NP_082615.1 |  |
| 272 | thiosulfate sulfurtransferase                                  | Q8BJU2.1    |  |
| 273 | transaldolase                                                  | Q9WVA4.4    |  |
| 274 | trifunctional enzyme subunit alpha, mitochondrial              | Q8BMS1.1    |  |
| 275 | trimethyllysine dioxygenase, mitochondrial                     | NP_776095.2 |  |
| 276 | triosephosphate isomerase                                      | NP_613065.2 |  |
| 277 | UDP-glucose 4-epimerase                                        | NP_848476.1 |  |
| 278 | UDP-N-acetylhexosamine pyrophosphorylase-like protein 1        | Q9JMH6.3    |  |
| 279 | very long-chain specific acyl-CoA dehydrogenase, mitochondrial | NP_059062.1 |  |
| 280 | xanthine dehydrogenase 1                                       | O88342.3    |  |
|     |                                                                |             |  |
| 1   | Others                                                         |             |  |
| 2   | SPRY domain-containing protein 7                               | NP_079973.1 |  |
| 3   | consortin (Golgi protein)                                      | NP_666217.2 |  |
| 4   | adenylate cyclase type 6                                       | NP_031431.2 |  |
| 5   | adiponectin                                                    | NP_033735.3 |  |
| 6   | desmoyokin (scaffold nuclear protein)                          | NP_033773.1 |  |
| 7   | apolipoprotein A-I-binding protein precursor                   | NP_659146.1 |  |
| 8   | apolipoprotein o0like                                          | NP_080841.1 |  |
| 9   | aquaporin 1                                                    | NP_031498.1 |  |
| 10  | ADP-ribosylation factor-like protein 15                        | NP_766183.1 |  |
| 11  | ADP-ribosylation factor-like protein 3                         | NP_062692.1 |  |
| 12  | ataxin 10                                                      | P28658.2    |  |
| 13  | BCL2-like 13 (apoptosis facilitator)                           | AAH29016.1  |  |

|    |                                                                   |                |  |
|----|-------------------------------------------------------------------|----------------|--|
| 14 | <b>baculoviral IAP repeat-containing 6</b>                        | NP_031592.2    |  |
| 15 | <b>complement C3 precursor</b>                                    | NP_033908.2    |  |
| 16 | <b>Complement component 4B</b>                                    | AAH67394.1     |  |
| 17 | <b>Calreticulin (ER Ca<sup>2+</sup> chaperone)</b>                | AAH03453.1     |  |
| 18 | <b>CD3-epsilon-associated protein</b>                             | O15446.1       |  |
| 19 | <b>C-type lectin domain family 2 member D</b>                     | Q91V08.1       |  |
| 20 | <b>Neighbor of COX4</b>                                           | O70378.1       |  |
| 21 | <b>Copine I</b>                                                   | NP_733467.1    |  |
| 22 | <b>cysteine and glycine-rich protein 1</b>                        | P97315.3       |  |
| 23 | <b>DNA segment, Chr 10, Johns Hopkins University 81 expressed</b> | AAH13475.1     |  |
| 24 | <b>DNA segment, Chr 10, Wayne State University 52, expressed</b>  | AAH03288.1     |  |
| 25 | <b>DNA segment, Chr 1, Pasteur Institute 1</b>                    | AAI39287.1     |  |
| 26 | <b>disheveled-associated activator of morphogenesis 1</b>         | Q8BPM0.4       |  |
| 27 | <b>drebrin-like protein</b>                                       | Q62418.2       |  |
| 28 | <b>DNA damage-binding protein 1</b>                               | Q3U1J4.2       |  |
| 29 | <b>estrogen receptor-binding fragment-associated protein 9</b>    | Q9D0V7.2       |  |
| 30 | <b>EFR3 homolog A</b>                                             | AAH07482.1     |  |
| 31 | <b>Family with sequence similarity 176, member B</b>              | NP_742157.1    |  |
| 32 | <b>Family with sequence similarity 49, member b</b>               | NP_659095.1    |  |
| 33 | <b>fermitin family homolog 2</b>                                  | NP_666166.2    |  |
| 34 | <b>protein furry homolog-like</b>                                 | NP_082470.2    |  |
| 35 | <b>ferritin heavy chain</b>                                       | NP_032010.2    |  |
| 36 | <b>ferritin light chain 1</b>                                     | NP_034370.2    |  |
| 37 | <b>Ferritin light chain 2</b>                                     | P49945.2       |  |
| 38 | <b>FYVE and coiled-coil domain-containing protein 1</b>           | NP_001103723.1 |  |
| 39 | <b>High density lipoprotein (HDL) binding protein</b>             | Q8VDJ3.1       |  |
| 40 | <b>Heme binding protein 1</b>                                     | Q9R257.1       |  |
| 41 | <b>huntingtin</b>                                                 | P42859.2       |  |
| 42 | <b>immunoglobulin superfamily member 8</b>                        | Q8R366.2       |  |
| 43 | <b>LIM and SH3 protein 1</b>                                      | Q61792.1       |  |

|    |                                                                        |                |  |
|----|------------------------------------------------------------------------|----------------|--|
| 44 | leucine-rich PPR motif-containing protein, mitochondrial               | Q6PB66.2       |  |
| 45 | Leucine rich repeat containing 59                                      | NP_598568.1    |  |
| 46 | Melanoma-associated antigen MUC18                                      | Q8R2Y2.        |  |
| 47 | MMS19 nucleotide excision repair protein homolog                       | Q9D071.        |  |
| 48 | protein MON2 homolog isoform 2                                         | NP_001156497.1 |  |
| 49 | neuroblastoma-amplified protein                                        | NP_081982.1    |  |
| 50 | NHL repeat-containing protein 3                                        | Q8CCH2.1       |  |
| 51 | Neuropilin 1 (CD305, receptor)                                         | P97333.2       |  |
| 52 | Proliferation-associated protein 2G4                                   | P50580.3       |  |
| 53 | protein kinase C and casein kinase II substrate protein 3              | NP_112019.2    |  |
| 54 | Parkinson disease (autosomal recessive, early onset) 7                 | Q99LX0.1       |  |
| 55 | programmed cell death 6-interacting protein 1                          | NP_001158149.1 |  |
| 56 | phosphatidylinositol-binding clathrin assembly protein                 | NP_666306.2    |  |
| 57 | phosphatidylinositol glycan anchor biosynthesis, class K,              | Q9CXY9.2       |  |
| 58 | phosphatidylinositol transfer protein, beta                            | P53811.2       |  |
| 59 | transcriptional activator protein Pur-alpha                            | P42669.1       |  |
| 60 | retinitis pigmentosa 2 homolog                                         | NP_598430.1    |  |
| 61 | SAM domain and HD domain, 1                                            | Q60710.2       |  |
| 62 | Serum deprivation-response protein                                     | Q63918.3       |  |
| 63 | selenium-binding protein 2                                             | Q63836.2       |  |
| 64 | septin 7 (GTP binding protein)                                         | Q9Z2Q6.2       |  |
| 65 | sideroflexin-1                                                         | NP_081600.1    |  |
| 66 | sideroflexin-3                                                         | Q91V61.1       |  |
| 67 | Delta-sarcoglycan                                                      | P82347.1       |  |
| 68 | small glutamine-rich tetratricopeptide repeat-containing protein alpha | Q8BJU0.2       |  |
| 69 | nucleotide exchange factor SIL1                                        | NP_109674.2    |  |
| 70 | Substance-P receptor;                                                  | P30548.2       |  |
| 71 | protein sprouty homolog 4                                              | Q9WTP2.1       |  |
| 72 | signal transducer and activator of transcription 1 (stat1)             | NP_001192242.1 |  |
| 73 | antigen peptide transporter 1                                          | NP_663531.1    |  |

|    |                                           |             |  |
|----|-------------------------------------------|-------------|--|
| 74 | TAR DNA binding protein                   | Q8BYA0.1    |  |
| 75 | T-complex protein 1 (chaperonin)          | NP_033407.1 |  |
| 76 | thyroid hormone-inducible hepatic protein | NP_076253.1 |  |
| 77 | toll interacting protein                  | NP_033455.1 |  |
| 78 | translationally-controlled tumor protein  | NP_080784.1 |  |
| 79 | Proliferation-associated protein 2G4      | P50580.3    |  |

\*The determination of palmitoylated proteins that have been implicated in Glut4 vesicle trafficking is based on the Mass

Spectrum Data of Glut4 vesicles from edrychowski MP, Gartner CA, Gygi SP, Zhou L, Herz J, Kandror KV, Pilch PF, 2010 J. Biol. Chem. 285: 104-14
